# Supplementary material
Source: PubMed Central journal article supplement (PMC7882023)
Supplement: NIHMS1653473-supplement-1.pdf [file NIHMS1653473-supplement-1.pdf]

Supplemental Table 1A

|                       | Variable      | Age (years)         | Percent Female        | Seizure Duration     | Seizure Freq (per mo) | Number (#) Sz Types   | # Limbs Moving |
|-----------------------|---------------|---------------------|-----------------------|----------------------|-----------------------|-----------------------|----------------|
| DS                    | Mean          | 41.4                | 74                    | 2:48 m:s             | 10.2                  | 1.7                   | 3.6            |
|                       | Mean $\pm$ SE | 39.6-43.2           | 68-80                 | 2:16 m:s-3:27 m:s    | 8.0-13.0              | 1.6-1.9               | 3.4-3.7        |
|                       | IQR 25-75     | 28.7-51.5           |                       | 1:00 m:s-8:52 m:s    | 2.9-31.2              | 1.0-2.0               | 4.0-4.0        |
| Mixed                 | Mean          | 37.4                | 81                    | 1:48 m:s             | 13.6                  | 3.0                   | 3.4            |
|                       | Mean $\pm$ SE | 33.8-41.0           | 68-94                 | 1:23 m:s-2:21 m:s    | 8.2-22.6              | 2.6-3.4               | 3.1-3.8        |
|                       | IQR 25-75     | 28.0-45.5           |                       | 1:16 m:s-2:35 m:s    | 6.5-30.5              | 2.0-3.0               | 4.0-4.0        |
| ES                    | Mean          | 37.1                | 50                    | 1:28 m:s             | 5.5                   | 1.7                   | 3.4            |
|                       | Mean $\pm$ SE | 36.1-38.0           | 46-54                 | 1:19 m:s-1:37 m:s    | 4.8-6.3               | 1.6-1.8               | 3.2-3.5        |
|                       | IQR 25-75     | 26.0-48.0           |                       | 0:32 m:s-3:30 m:s    | 1.5-20.0              | 1.0-2.0               | 2.0-4.0        |
| PSLE                  | Mean          | 43.6                | 53                    | 1:55 m:s             | 10.3                  | 1.3                   | 2.4            |
|                       | Mean $\pm$ SE | 38.8-48.4           | 42-64                 | 1:09 m:s-3:12 m:s    | 6.7-15.8              | 1.1-1.4               | 2.0-2.8        |
|                       | IQR 25-75     | 25.7-57.5           |                       | 0:30 m:s-4:54 m:s    | 4.2-30.5              | 1.0-1.0               | 1.5-4.0        |
| Inconclusive          | Mean          | 41.1                | 66                    | 2:18 m:s             | 4.8                   | 1.8                   | 3.5            |
|                       | Mean $\pm$ SE | 39.8-42.4           | 62-71                 | 1:55 m:s-2:47 m:s    | 4.1-5.7               | 1.7-1.9               | 3.3-3.6        |
|                       | IQR 25-75     | 29.7-52.0           |                       | 0:45 m:s-4:00 m:s    | 2.0-14.7              | 1.0-2.0               | 4.0-4.0        |
| P-value of Comparison | DS vs ES      | <b><u>0.029</u></b> | <b><u>0.00022</u></b> | <b><u>0.0092</u></b> | <b><u>0.024</u></b>   | 0.77                  | 0.13           |
|                       | Mixed vs DS   | 0.32                | 0.75                  | 0.24                 | 0.62                  | <b><u>0.00085</u></b> | 0.64           |
|                       | Mixed vs ES   | 0.93                | 0.019                 | 0.51                 | 0.11                  | <b><u>0.00064</u></b> | 0.86           |

Supplemental Table 1: Prevalence or value of each of the evaluated factors as well as age and sex. Intervals reflect mean plus and minus the standard error. **Bold-underlined** p-values indicate  $\alpha < 0.05$ , uncorrected. Shading of cells assists with visual alignment and has no other interpretation. For continuous variables (A), p-values are from heteroskedastic t-tests. For seizure duration and seizure frequency, values were log transformed prior to testing. For binary variables (B & C), p-values are based on Fisher exact tests. Abbreviations: Number (#), Seizure (Sz), Frequency (Freq), minutes (m), seconds (s).

Supplemental Table 1B

| Variable                      | DS   |             | Mixed |             | ES   |             | PSLE |             | inconclusive |             | P-value of Comparison |               |                |
|-------------------------------|------|-------------|-------|-------------|------|-------------|------|-------------|--------------|-------------|-----------------------|---------------|----------------|
|                               | Rate | 95% CI      | Rate  | 95% CI      | Rate | 95% CI      | Rate | 95% CI      | Rate         | 95% CI      | DS vs ES              | Mixed vs DS   | Mixed vs ES    |
| Injury from Sz                | 0.39 | (0.28-0.50) | 0.81  | (0.62-1.00) | 0.45 | (0.39-0.52) | 0.26 | (0.10-0.48) | 0.46         | (0.37-0.55) | 0.36                  | <b>0.0024</b> | <b>0.0079</b>  |
| Trigger: Sleep Deprivation    | 0.34 | (0.23-0.45) | 0.63  | (0.37-0.88) | 0.41 | (0.35-0.48) | 0.26 | (0.10-0.48) | 0.37         | (0.29-0.46) | 0.28                  | <b>0.047</b>  | 0.12           |
| Catamenial                    | 0.09 | (0.03-0.16) | 0.25  | (0.06-0.50) | 0.12 | (0.08-0.17) | 0.05 | (0.00-0.16) | 0.07         | (0.02-0.11) | 0.54                  | 0.092         | 0.24           |
| Trigger: Light                | 0.25 | (0.15-0.36) | 0.38  | (0.12-0.63) | 0.16 | (0.11-0.21) | 0.16 | (0.00-0.32) | 0.14         | (0.08-0.20) | 0.088                 | 0.35          | <b>0.037</b>   |
| Trigger: Food                 | 0.08 | (0.02-0.15) | 0.25  | (0.06-0.50) | 0.13 | (0.08-0.18) | 0.11 | (0.00-0.27) | 0.03         | (0.00-0.06) | 0.31                  | 0.066         | 0.25           |
| Trigger: Missing Meds         | 0.25 | (0.15-0.36) | 0.56  | (0.31-0.82) | 0.41 | (0.34-0.48) | 0.05 | (0.00-0.16) | 0.34         | (0.26-0.43) | <b>0.01</b>           | <b>0.018</b>  | 0.30           |
| Trigger: Loud Noises          | 0.10 | (0.03-0.19) | 0.19  | (0.00-0.38) | 0.06 | (0.02-0.09) | 0.05 | (0.00-0.16) | 0.07         | (0.02-0.12) | 0.20                  | 0.39          | 0.079          |
| Trigger: Stress               | 0.57 | (0.45-0.68) | 0.69  | (0.43-0.88) | 0.49 | (0.43-0.56) | 0.26 | (0.10-0.48) | 0.51         | (0.43-0.60) | 0.24                  | 0.58          | 0.20           |
| Trigger: Emotional Situations | 0.32 | (0.22-0.43) | 0.25  | (0.06-0.50) | 0.19 | (0.13-0.24) | 0.16 | (0.00-0.32) | 0.18         | (0.11-0.25) | <b>0.017</b>          | 0.77          | 0.52           |
| Trigger: Alcohol              | 0.05 | (0.01-0.11) | 0.13  | (0.00-0.32) | 0.08 | (0.04-0.13) | 0.05 | (0.00-0.16) | 0.04         | (0.00-0.08) | 0.46                  | 0.27          | 0.63           |
| Any Aura                      | 0.77 | (0.67-0.86) | 0.88  | (0.68-1.00) | 0.72 | (0.66-0.78) | 0.58 | (0.36-0.79) | 0.66         | (0.58-0.75) | 0.55                  | 0.51          | 0.25           |
| Aura: Headache                | 0.19 | (0.11-0.29) | 0.00  | (0.00-0.13) | 0.07 | (0.04-0.11) | 0.05 | (0.00-0.16) | 0.04         | (0.00-0.08) | <b>0.0047</b>         | 0.065         | 0.61           |
| Aura: Urinary urge            | 0.00 | (0.00-0.03) | 0.00  | (0.00-0.13) | 0.00 | (0.00-0.02) | 0.00 | (0.00-0.11) | 0.01         | (0.00-0.03) | 1.00                  | 1.00          | 1.00           |
| Aura: Epigastric              | 0.05 | (0.01-0.11) | 0.13  | (0.00-0.32) | 0.07 | (0.04-0.11) | 0.16 | (0.00-0.32) | 0.09         | (0.04-0.14) | 0.61                  | 0.27          | 0.36           |
| Aura: Anxiety or Fear         | 0.13 | (0.06-0.21) | 0.19  | (0.00-0.38) | 0.15 | (0.10-0.20) | 0.21 | (0.05-0.43) | 0.16         | (0.10-0.23) | 0.85                  | 0.69          | 0.71           |
| Aura: Déjà vu                 | 0.03 | (0.00-0.07) | 0.00  | (0.00-0.13) | 0.12 | (0.08-0.17) | 0.05 | (0.00-0.16) | 0.09         | (0.05-0.15) | <b>0.0091</b>         | 1.00          | 0.23           |
| Aura: Scent                   | 0.09 | (0.03-0.16) | 0.13  | (0.00-0.32) | 0.06 | (0.02-0.09) | 0.11 | (0.00-0.27) | 0.13         | (0.08-0.19) | 0.30                  | 0.65          | 0.26           |
| Aura: Pleasant Scent          | 0.01 | (0.00-0.04) | 0.00  | (0.00-0.13) | 0.00 | (0.00-0.01) | 0.00 | (0.00-0.11) | 0.02         | (0.00-0.06) | 0.24                  | 1.00          | 1.00           |
| Aura: Unpleasant Scent        | 0.06 | (0.01-0.13) | 0.13  | (0.00-0.32) | 0.02 | (0.00-0.05) | 0.00 | (0.00-0.11) | 0.08         | (0.03-0.14) | 0.14                  | 0.35          | 0.082          |
| Aura: Metallic Scent          | 0.01 | (0.00-0.04) | 0.06  | (0.00-0.19) | 0.05 | (0.02-0.08) | 0.11 | (0.00-0.27) | 0.06         | (0.02-0.11) | 0.20                  | 0.32          | 0.58           |
| Sz From Sleep                 | 0.44 | (0.33-0.56) | 0.63  | (0.37-0.88) | 0.57 | (0.50-0.64) | 0.26 | (0.10-0.48) | 0.53         | (0.45-0.62) | 0.066                 | 0.27          | 0.80           |
| Fall during Sz                | 0.52 | (0.40-0.64) | 0.75  | (0.50-0.94) | 0.59 | (0.52-0.65) | 0.42 | (0.21-0.64) | 0.55         | (0.47-0.64) | 0.36                  | 0.11          | 0.29           |
| Loss of Awareness             | 0.64 | (0.53-0.75) | 0.75  | (0.50-0.94) | 0.67 | (0.61-0.74) | 0.42 | (0.21-0.64) | 0.66         | (0.58-0.75) | 0.58                  | 0.56          | 0.59           |
| Dialectic                     | 0.19 | (0.11-0.29) | 0.31  | (0.12-0.57) | 0.15 | (0.10-0.20) | 0.16 | (0.00-0.32) | 0.18         | (0.11-0.25) | 0.37                  | 0.32          | 0.15           |
| Maximum Intensity at Onset    | 0.27 | (0.18-0.38) | 0.31  | (0.12-0.57) | 0.22 | (0.17-0.28) | 0.26 | (0.10-0.48) | 0.26         | (0.18-0.33) | 0.35                  | 0.76          | 0.37           |
| Amnesia                       | 0.71 | (0.61-0.82) | 0.75  | (0.50-0.94) | 0.61 | (0.54-0.67) | 0.42 | (0.21-0.64) | 0.58         | (0.49-0.66) | 0.10                  | 1.00          | 0.30           |
| Aphasia                       | 0.66 | (0.55-0.77) | 0.63  | (0.37-0.88) | 0.63 | (0.56-0.69) | 0.53 | (0.31-0.74) | 0.63         | (0.54-0.71) | 0.59                  | 0.78          | 1.00           |
| Oral injury                   | 0.42 | (0.31-0.54) | 0.69  | (0.43-0.88) | 0.49 | (0.43-0.56) | 0.21 | (0.05-0.43) | 0.48         | (0.40-0.57) | 0.24                  | 0.057         | 0.20           |
| Muscle jerks                  | 0.16 | (0.07-0.25) | 0.50  | (0.25-0.75) | 0.11 | (0.07-0.15) | 0.16 | (0.00-0.32) | 0.16         | (0.10-0.23) | 0.31                  | <b>0.0053</b> | <b>0.00025</b> |
| Tonic-clonic movements        | 0.36 | (0.25-0.47) | 0.56  | (0.31-0.82) | 0.35 | (0.29-0.42) | 0.05 | (0.00-0.16) | 0.30         | (0.22-0.38) | 0.89                  | 0.17          | 0.11           |
| Whole body movements          | 0.61 | (0.5-0.72)  | 0.69  | (0.43-0.88) | 0.52 | (0.45-0.59) | 0.11 | (0.00-0.27) | 0.50         | (0.41-0.58) | 0.19                  | 0.78          | 0.21           |
| Part of the body movements    | 0.36 | (0.25-0.47) | 0.38  | (0.12-0.63) | 0.26 | (0.20-0.32) | 0.21 | (0.05-0.43) | 0.19         | (0.12-0.26) | 0.11                  | 1.00          | 0.38           |
| Stiffening                    | 0.40 | (0.29-0.52) | 0.31  | (0.12-0.57) | 0.38 | (0.31-0.45) | 0.26 | (0.10-0.48) | 0.34         | (0.26-0.43) | 0.79                  | 0.58          | 0.79           |
| Shaking                       | 0.61 | (0.50-0.72) | 0.63  | (0.37-0.88) | 0.51 | (0.44-0.57) | 0.26 | (0.10-0.48) | 0.50         | (0.41-0.58) | 0.12                  | 1.00          | 0.44           |
| Flailing                      | 0.06 | (0.01-0.13) | 0.06  | (0.00-0.19) | 0.07 | (0.03-0.10) | 0.00 | (0.00-0.11) | 0.05         | (0.01-0.09) | 1.00                  | 1.00          | 1.00           |
| Numbness                      | 0.19 | (0.11-0.29) | 0.25  | (0.06-0.50) | 0.07 | (0.04-0.11) | 0.11 | (0.00-0.27) | 0.10         | (0.05-0.16) | <b>0.0047</b>         | 0.73          | <b>0.037</b>   |

Supplemental Table 1C

| Variable                        | DS   |             | Mixed |             | ES   |             | PSLE |             | inconclusive |             | P-value of Comparison |               |               |
|---------------------------------|------|-------------|-------|-------------|------|-------------|------|-------------|--------------|-------------|-----------------------|---------------|---------------|
|                                 | Rate | 95% CI      | Rate  | 95% CI      | Rate | 95% CI      | Rate | 95% CI      | Rate         | 95% CI      | DS vs ES              | Mixed vs DS   | Mixed vs ES   |
| Tingling                        | 0.19 | (0.11-0.29) | 0.19  | (0.00-0.38) | 0.09 | (0.05-0.13) | 0.21 | (0.05-0.43) | 0.12         | (0.06-0.18) | <b>0.013</b>          | 1             | 0.18          |
| Dizziness                       | 0.16 | (0.07-0.25) | 0.00  | (0.00-0.13) | 0.07 | (0.04-0.11) | 0.16 | (0.00-0.32) | 0.08         | (0.03-0.14) | <b>0.043</b>          | 0.12          | 0.61          |
| Hallucinations                  | 0.13 | (0.06-0.21) | 0.13  | (0.00-0.32) | 0.08 | (0.04-0.12) | 0.11 | (0.00-0.27) | 0.07         | (0.02-0.11) | 0.18                  | 1             | 0.63          |
| Incontinence                    | 0.26 | (0.16-0.37) | 0.63  | (0.37-0.88) | 0.33 | (0.27-0.40) | 0.21 | (0.05-0.43) | 0.33         | (0.24-0.41) | 0.26                  | <b>0.0075</b> | <b>0.028</b>  |
| Limb Automatism                 | 0.04 | (0.00-0.10) | 0.19  | (0.00-0.38) | 0.16 | (0.11-0.21) | 0.11 | (0.00-0.27) | 0.07         | (0.02-0.12) | <b>0.0056</b>         | 0.061         | 0.73          |
| Oral Automatism                 | 0.16 | (0.07-0.25) | 0.50  | (0.25-0.75) | 0.17 | (0.12-0.22) | 0.11 | (0.00-0.27) | 0.15         | (0.08-0.21) | 0.86                  | <b>0.0053</b> | <b>0.0038</b> |
| Hip thrusting                   | 0.04 | (0.00-0.10) | 0.06  | (0.00-0.19) | 0.04 | (0.01-0.07) | 0.00 | (0.00-0.11) | 0.04         | (0.00-0.08) | 1                     | 0.54          | 0.51          |
| Head Movements                  | 0.45 | (0.35-0.58) | 0.63  | (0.37-0.88) | 0.36 | (0.29-0.42) | 0.11 | (0.00-0.27) | 0.29         | (0.21-0.38) | 0.14                  | 0.28          | 0.058         |
| Leftward Head Version           | 0.05 | (0.01-0.11) | 0.25  | (0.06-0.50) | 0.11 | (0.07-0.16) | 0.00 | (0.00-0.11) | 0.05         | (0.01-0.09) | 0.18                  | <b>0.028</b>  | 0.11          |
| Rightward Head Version          | 0.09 | (0.03-0.16) | 0.13  | (0.00-0.32) | 0.09 | (0.05-0.13) | 0.00 | (0.00-0.11) | 0.09         | (0.05-0.15) | 1                     | 0.65          | 0.64          |
| Side-to-side Head Movements     | 0.09 | (0.03-0.16) | 0.25  | (0.06-0.50) | 0.07 | (0.04-0.11) | 0.11 | (0.00-0.27) | 0.05         | (0.01-0.09) | 0.62                  | 0.092         | <b>0.032</b>  |
| Staring                         | 0.38 | (0.27-0.49) | 0.69  | (0.43-0.88) | 0.39 | (0.33-0.46) | 0.32 | (0.10-0.53) | 0.31         | (0.24-0.40) | 0.89                  | <b>0.028</b>  | <b>0.033</b>  |
| Eye Movements                   | 0.40 | (0.29-0.52) | 0.38  | (0.12-0.63) | 0.34 | (0.28-0.41) | 0.16 | (0.00-0.32) | 0.30         | (0.22-0.38) | 0.34                  | 1             | 0.79          |
| Leftward Eye Version            | 0.00 | (0.00-0.03) | 0.13  | (0.00-0.32) | 0.07 | (0.04-0.11) | 0.05 | (0.00-0.16) | 0.01         | (0.00-0.03) | <b>0.009</b>          | <b>0.028</b>  | 0.36          |
| Rightward Eye Version           | 0.03 | (0.00-0.07) | 0.06  | (0.00-0.19) | 0.03 | (0.01-0.06) | 0.05 | (0.00-0.16) | 0.03         | (0.00-0.06) | 1                     | 0.44          | 0.44          |
| Upwards Eye Deviation           | 0.16 | (0.07-0.25) | 0.06  | (0.00-0.19) | 0.10 | (0.05-0.14) | 0.00 | (0.00-0.11) | 0.07         | (0.02-0.12) | 0.15                  | 0.45          | 1             |
| Eye Rolling                     | 0.14 | (0.06-0.23) | 0.13  | (0.00-0.32) | 0.10 | (0.06-0.14) | 0.05 | (0.00-0.16) | 0.09         | (0.04-0.14) | 0.3                   | 1             | 0.67          |
| Eye Fluttering                  | 0.08 | (0.02-0.15) | 0.13  | (0.00-0.32) | 0.05 | (0.02-0.08) | 0.05 | (0.00-0.16) | 0.07         | (0.02-0.11) | 0.4                   | 0.62          | 0.21          |
| Eye closure                     | 0.23 | (0.14-0.33) | 0.19  | (0.00-0.38) | 0.10 | (0.06-0.14) | 0.11 | (0.00-0.27) | 0.09         | (0.04-0.14) | <b>0.0059</b>         | 1             | 0.23          |
| Eye opening                     | 0.18 | (0.10-0.28) | 0.25  | (0.06-0.50) | 0.16 | (0.11-0.21) | 0.26 | (0.10-0.48) | 0.10         | (0.05-0.16) | 0.6                   | 0.5           | 0.31          |
| Freezing                        | 0.09 | (0.03-0.16) | 0.00  | (0.00-0.13) | 0.04 | (0.01-0.07) | 0.11 | (0.00-0.27) | 0.01         | (0.00-0.04) | 0.14                  | 0.6           | 1             |
| Ictal Cry                       | 0.13 | (0.06-0.21) | 0.38  | (0.12-0.63) | 0.21 | (0.16-0.27) | 0.11 | (0.00-0.27) | 0.17         | (0.10-0.24) | 0.14                  | <b>0.029</b>  | 0.13          |
| Ictal Anxiety                   | 0.18 | (0.10-0.28) | 0.06  | (0.00-0.19) | 0.11 | (0.07-0.16) | 0.05 | (0.00-0.16) | 0.15         | (0.08-0.21) | 0.12                  | 0.45          | 1             |
| Post-ictal Confusion or Fatigue | 0.86 | (0.77-0.94) | 1.00  | (0.87-1.00) | 0.84 | (0.79-0.89) | 0.53 | (0.31-0.74) | 0.85         | (0.79-0.92) | 0.86                  | 0.2           | 0.14          |
| Post-ictal Muscle Soreness      | 0.61 | (0.50-0.72) | 0.50  | (0.25-0.75) | 0.38 | (0.31-0.44) | 0.26 | (0.10-0.48) | 0.55         | (0.47-0.64) | <b>0.00054</b>        | 0.42          | 0.43          |
| Post-ictal Headache             | 0.62 | (0.51-0.73) | 0.75  | (0.50-0.94) | 0.49 | (0.42-0.55) | 0.21 | (0.05-0.43) | 0.51         | (0.43-0.60) | <b>0.037</b>          | 0.4           | 0.068         |
